30 **Summary**

31 Internal organs of ectotherms have melanin-containing cells. Several studies analyzed  
32 their developmental origin, role in immunity, and hormonal regulation. However, little is known  
33 about how environmental variables influence the distribution and quantity of organ coloration.  
34 Here, we addressed how environmental variables (temperature, UV, and photoperiod) influence  
35 the internal coloration of amphibians after controlling for spatial and phylogenetic  
36 autocorrelations. Coloration in all organs was correlated with phylogeny. However, the  
37 coloration of the heart, kidneys, and rectum of hylids, *R. schneideri*, some *Leptodactylus*, and  
38 *Proceratophrys* were influenced by temperature and photoperiod, whereas that of the testicle,  
39 lumbar parietal peritoneum, lungs, and mesenterium of Leiuperinae, Hylodidae, *Adenomera*,  
40 most *Leptodactylus* were influenced by UVB and temperature variation. Therefore, the amount  
41 of internal melanin seems to be a key trait influencing species distribution of frogs throughout  
42 space, since it can protect internal organs against the deleterious effect of high UV-B,  
43 temperature variation, and photoperiod.

44 **Key-words:** Internal melanin, Frog, UVB, Temperature, Photoperiod.

45

46 **Significance**

47 The functions of internal coloration in fishes and frogs are little known. Internal pigmentation is  
48 commonly altered in fish and the degree of response is correlated with body transparency levels,  
49 suggesting possible adaptive functions. Here, we assume that internal melanin has protective  
50 functions against UV-B, temperature variation, and photoperiod. Thus it could influence frogs  
51 species distribution throughout space. The melanin coloration of each organ was influenced by  
52 distinct environmental variables depending on the lineages of species. Our results could direct  
53 further studies about the functions of internal coloration.

54

## 55 **Introduction**

56 Vertebrates have a variety of body color patterns whose evolution is shaped by both  
57 natural and sexual selection (Aspengren et al., 2009). The body color of ectotherms may vary in  
58 response to environmental changes in a number of ways. The mechanisms underlying those  
59 changes include physiological color changes that works by a rapid pigment transportation in the  
60 cell cytoplasm (Bagnara and Matsumoto, 2006; Aspengren et al., 2009; Sköld et al., 2012).  
61 Cells responsible for color changes in fish and amphibians are called chromatophores, which  
62 can be subdivided into melanophores, erythrophores, xanthophors, and iridophores (Wallin,  
63 2002; Bagnara and Matsumoto, 2006).

64 The internal organs and structures of ectotherms can also have different color patterns,  
65 which are given by different pigments. One of these pigments is melanin, which occurs in cells  
66 called melanocytes. These cells produce and store melanin (Agius and Roberts, 2003; Oliveira  
67 and Franco-Belussi, 2012) and are similar to skin melanocytes (Zuasti et al., 1998; Franco-  
68 Belussi et al., 2013). Melanocytes occur in internal organs and membranes of amphibians  
69 (Oliveira and Franco-Belussi, 2012) and fish (Agius, 1981).

70 Environmental variables influence physiological and behavioral aspects of ectotherms.  
71 For example, temperature can alter the internal coloration in anurans, due to the  
72 thermoprotective role of melanin-containing cells. High temperature decreases liver  
73 pigmentation in anurans (Santos et al., 2014). At low temperatures, animal's metabolism may be  
74 reduced. As a consequence, melanin in the liver increases (Barni et al., 1999).

75 Ultra-Violet (UV) radiation is one of the factors responsible for amphibian declines  
76 (Blaustein et al., 1997). Exposure to UV radiation affects embryonic development, causing  
77 morphological changes and tadpole mortality, which in turn result in population declines  
78 (Lipinski et al., 2016). Internal melanin seems to protect internal organs against the genotoxic  
79 effects of UV radiation (Roulin, 2014). For example, short-term (e.g., 24 h) exposure to UV  
80 radiation increases the coloration in both skin and organ's surface in adult anurans (Franco-  
81 Belussi et al., 2016).

82 Another environmental variable that alters the skin coloration of fish and anurans is  
83 photoperiod. Light disperses melanin granules in cells of amphibians, increasing coloration  
84 (Moriya et al., 1996). Previous studies showed that light intensity and time of exposure increase  
85 the skin color of fish (Han et al., 2005). Also, the secretion of Melanin Concentrating Hormone  
86 (MCH) increases in fish after long photoperiods (Lyon and Baker 1993). The MCH is involved  
87 in the aggregation of melanin granules, which makes the animal lighter. However, little is  
88 known about how environmental factors influence the coloration of visceral organs in anurans.

89 The effects of environmental factors on internal coloration were analyzed under  
90 experimental conditions and in a few species. The main goal of these experimental studies was

91 to demonstrate the mechanistic basis of the responses of pigmentary cells to these factors. The  
92 only large-scale study that evaluated the distribution of coloration categories on organs of 32  
93 Neotropical anuran species (Provete et al., 2012) found that the intensity of coloration in several  
94 organs has a phylogenetic component. Nonetheless, little is known about how the organ's  
95 coloration of anuran species vary in response to environmental factors over broad spatial scales.

96 Here, we expand our previous study (Provete et al., 2012) to address this question using  
97 multivariate methods (Pavoine et al., 2011) considering intraspecific variation in organ  
98 coloration. Specifically, we asked how environmental variables (temperature, UV, and  
99 photoperiod) influence the internal coloration of anuran species after controlling for spatial and  
100 phylogenetic autocorrelations. Internal melanin can possibly confer adaptive advantages for  
101 species in response to environmental variables, as mentioned above. Therefore, internal melanin  
102 may influence species distribution throughout space.

103

## 104 **Results**

105

### 106 **Phylogenetic pattern of organ coloration**

107 Coloration considering all organs was correlated with the phylogeny. The greatest  
108 diversity was found in Leptodactylidae (Figure 1), followed by the node that includes all species  
109 except for Brachycephalidae and Microhylidae. The highest level of intraspecific variation  
110 occurred in *D. minutus* and to a lesser extent in Dendropsophryni (Figure 1). The organs that  
111 had the greatest diversity of coloration were the testis, heart, rectum, mesentery, peritoneum,  
112 and lung (Figures S1-S7).

113

### 114 **Relationships between organ coloration and environmental variables**

115 The co-inertia of first axis of the RLQ is 0.67, which is equivalent to 67% of the total  
116 variation. The positive side of the first axis corresponds to areas with high photoperiod. The  
117 localities most positively correlated with the first ordination axis were Ubatuba, Fazenda Rio  
118 Grande, Atibaia, Taubaté, and Rio Verde (Figure 2). Therefore, these localities had a high  
119 Bio10 and photoperiod (Figure 3A). The species found in those localities have similar  
120 coloration categories in the heart, kidneys, and rectum (Figure 3B). These species are most  
121 hylids, *R. schneideri*, some *Leptodactylus*, and *Proceratophrys* (Figure 4).

122 The negative side of the axis 1 represents localities with high UVB, Bio2, and Bio7  
123 (Figure 3A). The localities most negatively correlated with the first axis are Cristina and those

124 in the Northwest of the state of São Paulo, such as Santa Fé do Sul, Icém, Santo Antonio do  
125 Aracanguá, Teodoro Sampaio, Votuporanga, and Nova Itapirema (Figure 2). The species found  
126 in these localities have similar coloration categories in the testicle, lumbar parietal peritoneum,  
127 lungs, and mesenterium (Figure 3B). The species are Leiuperinae, Hylodidae, *Adenomera*, most  
128 *Leptodactylus*, and to a lesser extent the Brachycephaloidea and *Elachistocleis* (Figure 4).

129

## 130 **Discussion**

131 We found that the internal coloration in anurans was influenced by environmental  
132 variables and has a non-stationary phylogenetic component, mainly in the testicle and  
133 peritoneum. Interestingly, we also found a large intraspecific variation in coloration intensity in  
134 some lineages, mainly the Dendropsophryni tribe. In addition, different organ coloration  
135 appears to be influenced by different environmental variables. Interestingly, the mean value of  
136 organ coloration did not show a clear spatial pattern.

137 Both the diurnal (BIO2) and the annual (BIO7) thermal ranges influenced more strongly  
138 the coloration in the testicle, lumbar parietal peritoneum, lungs, and mesenterium. Melanin-  
139 containing cells protect tissues against temperature variation. Melanin decreases in hibernating  
140 species during the winter, due to both decreased synthesis and cellular apoptosis (Barni et al.,  
141 2002). Similarly, temperature variation reduced the hepatic pigmentation in a Neotropical  
142 anuran species (Santos et al., 2014), demonstrating that temperature is a key environmental  
143 factor controlling the amount of melanin in the liver. Melanin can also dissipate heat and is  
144 probably involved in thermoregulation in ectotherms (Cesarini, 1996). Thus, the amount of  
145 melanin may be a trait with possible adaptive functions that determine the occurrence of species  
146 in localities with wide variation in temperature.

147 UV-B radiation influences coloration in the same organs as temperature range. A  
148 previous study found that short-term exposure to low doses of UV-B increases internal  
149 coloration by increasing melanin production and dispersion (Franco-Belussi et al., 2016). UV  
150 radiation can cause genotoxic effects in cells by disrupting DNA (Ortonne et al., 2002). Melanin  
151 provides protection against solar radiation, by dissipating solar energy in the form of heat  
152 (Ortonne et al., 2002). As a result, tyrosinase activity increases in melanin-containing cells,  
153 which increases melanin production to protect cells against UV radiation (Friedmann and  
154 Gilchrest, 1987). Therefore, species that occur in sites with high UV-B incidence tend to have  
155 greater production of melanin as a mechanism to deal with its deleterious effects.

156 Photoperiod influenced the coloration on the heart, kidneys, and rectum. The effects of  
157 photoperiod on internal coloration are poorly known. However, photoperiod directly influences  
158 the endocrine system (Breet, 1979) that can indirectly alter melanin amount. An increase in  
159 photoperiod (e.g., 18:6 light:dark) promotes whitening of fish's skin by increasing the secretion  
160 of MCH (Lyon and Baker, 1993; Guinés et al., 2004). The adaptive value of coloration on the

161 heart, kidneys, and rectum is still not clearly understood (Colombo et al., 2011), but it is  
162 probably related to the functions of the melanin molecule which mainly acts as antibiotic, in  
163 light absorption (e.g., photoprotection), cation chelator, and free radical sink (Riley, 1997).  
164 Additionally, the intensity of coloration on the heart and kidneys of hylids tends to be lower  
165 than in the testicles of Leiuperinae, showing a phylogenetic signal.

166 We found that the amount of melanin on a given organ is determined jointly by its  
167 physiology, environmental variables, and phylogenetic relationship (see also Provete et al.,  
168 2012). Melanocytes have distinct physiology depending on the external coloration of the  
169 animal. For example, pigmented cells on the peritoneum of fish respond to hormones, such as  
170 melatonin and epinephrine (Sköld et al., 2010). However, the aggregation or dispersion of  
171 pigmented cells promoted by the hormone depends on the transparency of the animal (Sköld et  
172 al., 2010). This demonstrates that the internal pigment cells can adapt to distinct situations,  
173 behaving differently in animals depending on their cutaneous coloration (Sköld et al., 2010). In  
174 addition, changes in internal color in transparent animals may be related to substrate adaptation  
175 or social signaling (Sköld et al., 2010). These results reinforce the role of physiological  
176 responses of pigmented cells.

177 As UV radiation and temperature can have deleterious effects, species that occur in  
178 places with high incidence of these factors could have developed more melanin on the testicles  
179 as to protect their germinal epithelium, since damages in the gametes can influence the  
180 reproductive fitness of individuals. For example, hylodids have a large amount of melanin on  
181 the testicles and are restricted to the Atlantic rainforest. This region has the same degree of UV  
182 incidence of the northwest of São Paulo, where swamp frogs of the subfamily Leiuperinae  
183 occur. As a consequence, these species developed similar strategies to deal with elevated UV-B  
184 variation by having high amount of coloration on the testicles. Also, having a high amount of  
185 melanin on the testicles may allow species to be active during the day, such as dendrobatids  
186 (Grant et al., 2006), or at dusk like *Pseudopaludicola* and some *Physalaemus* (Vasconcelos and  
187 Rossa-Feres, 2005). Conversely, species lacking melanin on the testicles are mainly active at  
188 night (e.g., Hylidae and Leptodactylidae; Vasconcelos and Rossa-Feres, 2005).

189 Therefore, the amount of internal melanin seems to be a key trait influencing anuran  
190 species distribution throughout space, since it can protect internal organs against the deleterious  
191 effect of high UV-B, temperature variation, and photoperiod.

192

## 193 **Methods**

### 194 **Specimen sampling**

195 The anuran species used in this study were collected at night when calling, near  
196 breeding sites in 26 localities in the states of São Paulo and Goiás, which are housed at the  
197 collection of the Laboratório de Anatomia - UNESP. We used at least five adult males of each  
198 species for the analysis of pigmentation. The specimens were anesthetized with 5 g/L of  
199 benzocaine and dissected to expose the organs. All procedures followed the recommendations  
200 of the COBEA (Brazilian College of Animal Experimentation) and the Ethics Committee of our  
201 university (Protocol #70/07 CEEA). We also analyzed additional specimens from the amphibian  
202 collections of the Department of Zoology and Botany, UNESP (DZSJRP); Scientific Collection  
203 of the Laboratory of Zoology, University of Taubaté (CCLZU); and the Jorge Jim collection (JJ;  
204 now incorporated to the herpetological collection of the National Museum, MN-RJ) from three  
205 localities in the states of Paraná and Minas Gerais (Figure 5). All material examined is listed in  
206 Appendix 1. We also obtained data from the literature (Franco-Belussi et al., 2011; Franco-  
207 Belussi et al., 2012) for species of the family Hylidae. In total, we had 388 specimens from 43  
208 species belonging to six families. Species had different sample sizes because some of them were  
209 widely distributed. Thus, we wanted to assess if intraspecific variation in coloration was  
210 somehow related to spatial variation in coloration.

211

## 212 **Morphological data**

213 We recorded the distribution of visceral melanocytes in 15 organs or structures using a  
214 Leica stereoscopic microscope (MZ16), coupled with an image capture system, namely: heart,  
215 lungs, rectum, peritoneum, kidneys, testes, and intestinal mesenterium. For each individual, we  
216 recorded the coloration on these organs/structures based on coloration intensity, following the  
217 protocol of Franco-Belussi et al. (2009). Briefly, the intensity of organ coloration was divided  
218 into four categories, ranging from absence to entirely colored, as follows: Category 0) absence  
219 of pigment cells on the surface of organs, in which the usual color of the organ is evident;  
220 Category 1) a few scattered pigment cells, giving the organs a faint pigmentation; Category 2) a  
221 large amount of pigment cells; Category 3) a massive amount of pigment cells, rendering an  
222 intense pigmentation to the structure, changing its usual color and superficial vascularization  
223 (Franco-Belussi et al., 2009). Thus, for a given organ or structure, each individual could display  
224 four categories of pigmentation: 0, 1, 2, or 3. Pigmentation category was assessed in a double  
225 blind fashion. Pictures of organs and regions are freely available in Morphobank at  
226 <http://dx.doi.org/10.7934/P701>.

227 To minimize multicollinearity, we calculated the Variation Inflation Factor (VIF; Zuur  
228 et al., 2010) and a pair-wise correlation for the organs. Cardiac blood vessels, Renal veins, and  
229 Lumbar nerve plexus had a high VIF. Therefore, we excluded them from further analysis.

230

## 231 **Statistical analyses**



232 We extracted the bioclimatic variables Bio2, Bio3, Bio4, Bio5, Bio6, Bio7, and Bio10  
233 related to temperature from WorldClim (Hijmans et al., 2005) for the 26 localities. Data for  
234 photoperiod (minutes of light-hours in the rainy season, when most species were collected) were  
235 obtained from the Brazilian National Observatory (BRASIL 2016). Data for UV-B radiation  
236 were extracted from a raster file (Beckmann et al., 2014). We standardized all variables to zero  
237 mean and unit variance previously to analysis. Posteriorly, we tested for multicollinearity (Zuur  
238 et al., 2010) and removed environmental variables with VIF > 10. The reduced variables were  
239 Bio2, Bio7, Bio10, UVB, and photoperiod. We then tested for spatial correlation in the  
240 environmental variables. All environmental variables were spatially autocorrelated, with  
241 Moran's *I* varying between 0.154 and 0.485. The reduced matrix of environmental variables was  
242 analyzed with a Principal Component Analysis (PCA; Legendre and Legendre, 2012).

243 The phylogeny for the species to which we had trait data was pruned from the dated  
244 phylogeny of Pyron (2014) for amphibians. This phylogeny was inferred based on nine nuclear  
245 genes and three mitochondrial genes for 3,309 species, with average 20% of completeness. To  
246 this topology, we added each individual as a polytomy to its corresponding species with branch  
247 length equal to unit (Figure 6). Since our trait is categorical, we could not simply calculate its  
248 standard error to account for intraspecific variation. Then, we extracted a distance matrix from  
249 this phylogeny and calculated a Principal Coordinates Analysis (PCoA; Legendre and Legendre,  
250 2012) to extract phylogenetic eigenvectors.

251 For the species composition matrix, the presence of each individual analyzed was  
252 placed in rows and localities as columns. This matrix was analyzed with a Correspondence  
253 Analysis (CA).

254 To model space, we built a neighbor matrix linking sites separated up to 318.88 Km  
255 (based on the truncation distance of a Minimum Spanning Tree). Then, we computed a PCA  
256 onto this neighbor matrix to use as spatial variables in the extended RLQ.

257 The trait matrix contained the coloration category for each individual (rows) in each  
258 organ (columns). We then tested for phylogenetic correlation (phylogenetic “signal”) in the  
259 coloration of each organ by decomposing the trait diversity, calculated as Rao's entropy, along  
260 the nodes of the phylogeny (Pavoine et al., 2010). The Rao's quadratic entropy only uses tree  
261 topology to decompose trait diversity. Afterwards, we tested if the diversity of coloration  
262 categories was biased towards the root of the phylogeny, or concentrated in a single or a few  
263 nodes (Pavoine et al., 2010). In this context, a phylogenetic signal occurs when trait diversity is  
264 skewed towards the root of the phylogeny, implying that all its descending lineages would have  
265 similar values for that trait. We found a phylogenetic signal in the coloration of internal organs  
266 when we consider them altogether (Table S1), but not separately. Then, we calculated a distance  
267 matrix for traits based on the modified Gower similarity coefficient (Pavoine et al., 2009).  
268 Posteriorly, we tested for a relationship between environmental variables and the coloration of

269 each organ using a multivariate version of the Fourth-corner analysis. Significance was tested  
270 using the null model 4 (Dray and Legendre, 2008). All organs, but the pericardium had  
271 significant relationship with environmental variables. Thus, we excluded this organ from further  
272 analysis. Then, we calculated an Euclidian distance matrix for the categories of organ coloration  
273 (ordinal data). This distance matrix was then analyzed with PCoA. Finally, we used an extended  
274 version of the RLQ ordination (Pavoine et al., 2011) that takes into account the spatial  
275 dependency of environmental variables and the phylogenetic autocorrelation in species traits to  
276 test the influence of environmental variables on species traits. Analyses were implemented in R  
277 v. 3.3.2 (R Core Team 2016) package ade4 (Dray and Dufour, 2007) and functions provided by  
278 Pavoine et al. (2011). Data and an R script used to conduct analyses are available in FigShare  
279 (Franco-Belussi et al., 2017).

280

## 281 **Acknowledgments**

282 The study was supported by a research grant from the São Paulo Research Foundation -  
283 FAPESP (#2015/12006-9 and 05/02919-5) to C.O. and postdoc fellowships to LFB  
284 (#2014/00946-4) and DBP (#2016/13949-7). LFB was also supported by a CAPES-PNPD  
285 postdoc fellowship during the final preparation of this manuscript. T. Gonçalves-Souza and F.  
286 R. da Silva helped interpreting the analysis output. L. R. S. Santos, I. A. Martins, S. A. César, R.  
287 M. Moresco, and R. Zieri helped with specimen sampling. L. R. S. Santos provided additional  
288 specimens. B. Vilela and D. P. Silva kindly prepared the map. *Authors' contributions:* LFB  
289 collected the data. DBP analyzed and curated the data, prepared the figures and supplementary  
290 material. LFB and DBP prepared the first draft of the manuscript. CO designed the study,  
291 contributed chemicals and equipment. All authors read and approved the final manuscript.

292

## 293 **References**

- 294 Agius, C. (1981). Preliminary studies on the ontogeny of the melanomacrophages of teleost  
295 hematopoietic tissues and age-related changes. *Dev. Comp. Immunol.* 5, 597-606
- 296 Agius, C. and Roberts, R.J. (2003). Review: Melano-Macrophage Centres and their Role in Fish  
297 Pathology. *J. Fish Biol.* 26, 499-509
- 298 Aspengren, S., Hedberg, D., Sköld, H.N. and Wallin M. (2009). New Insights into  
299 Melanosome Transport in Vertebrate Pigment Cells. *Int. Rev. Cell Mol. Biol.* 272,  
300 245-302
- 301 Bagnara, J.T. and Matsumoto, J. (2006). Comparative Anatomy and Physiology of Pigment  
302 Cells in Nonmammalian Tissues. In: *The Pigmentary System: Physiology and*

- 303 Pathophysiology, Nordlund J. J., Boissy, R.E., Hearing, V.J., King, R. A., Ortonne, J-P,  
304 eds. (New York, Oxford: Oxford University Press) pp.9-40
- 305 Barni, S., Vaccarone R., Bertone V., Frascchini A., Bernini F. and Fenoglio C. (2002).  
306 Mechanisms of changes to the liver pigmentary componente during the annual cycle  
307 (activity and hibernation) of *Rana esculenta* L. J. Anat. 200,185–194
- 308 Barni, S., Bertone, V., Croce, A.C., Bottirolli, G., Bernini, F. and Gerzeli, G. (1999). Increase  
309 in Liver Pigmentation During Natural Hibernation in some Amphibians. J. Anat. 195,19-  
310 25
- 311 Beckmann, M.T., Václavík, A.M., Manceur, L., Šprtová, H., von Wehrden, E., Welk, A. F.,  
312 Cord, and Tatem, A. (2014). gLUV: a global UV-B radiation data set for macroecological  
313 studies. Methods Ecol. Evol. 5, 372-383
- 314 Blaustein, A. R., Kiesecker, J. M., Chivers, D. P., and Anthony, R. G. (1997). Ambient UV-B  
315 radiation causes deformities in amphibian embryos. Proc. Nat. Acad. Sc. 94, 13735-13737
- 316 BRASIL. (2016). Anuário do observatório nacional – efemérides astronômicas. Rio de Janeiro:  
317 Observatório Nacional - Ministério da Ciência, Tecnologia e inovação.
- 318 Brett, J.R. (1979). Environmental factors and growth. In: Fish Physiology, Vol. VIII, W.S.  
319 Hoar, D.J. Randall and J.R. Brett eds., (Academic Press, New York, USA) pp. 599-675
- 320 Cesarini, J.P. (1996). Melanins and their possible roles through biological evolution. Adv Space  
321 Res. 18, 35–40
- 322 Colombo, S., Berlim, I., Delmas, V. and Larue, L. (2011). Classical and non-classical  
323 melanocytes in vertebrates. In: Melanins and Melanosomes: Biosynthesis, Biogenesis,  
324 Physiological and Pathological Functions, 1st ed. Borovanský J, Riley PA eds., pp. 21-62
- 325 Dray, S. and Dufour, A.B. (2007). The ade4 package: implementing the duality diagram for  
326 ecologists. J. Stat. Softw. 22, 1-20
- 327 Dray, S. and Legendre, P. (2008). Testing the species traits-environment relationships: the  
328 fourth-corner problem revisited. Ecology. 89,3400-3412
- 329 Franco-Belussi, L., Zieri, R., Santos, L.R.S., Moresco, R.M. and Oliveira, C. (2009).  
330 Pigmentation in Anuran Testes: Anatomical Pattern and Variation. Anat. Rec. 292,178-  
331 182
- 332 Franco-Belussi, L., Santos, L. R. S., Zieri, R., and Oliveira, C. (2011). Visceral pigmentation in  
333 four *Dendropsophus species* (Anura: Hylidae): Occurrence and comparison. Zool. Anz.  
334 250,102-110
- 335 Franco-Belussi, L., Santos, L. R. S., Zieri, R., and Oliveira, C. (2012). Visceral pigmentation in  
336 three species of the genus *Scinax* (Anura: Hylidae): distinct morphological pattern. Anat.  
337 Rec. 295, 298-306

- 338 Franco-Belussi, L., Castrucci, A.M.D.L. and Oliveira, C. (2013). Responses of melanocytes and  
339 melanomacrophages of *Eupemphix nattereri* (Anura: Leiuperidae) to Nle<sup>4</sup>, D-Phe<sup>7</sup>- $\alpha$ -  
340 melanocyte stimulating hormone and lipopolysaccharides. *Zool.* 116, 316-324.
- 341 Franco-Belussi, L., Sköld, H. N. and Oliveira, C. (2016). Internal pigment cells respond to  
342 external UV radiation in frogs. *J. Exp. Biol.* 219, 1378-1383
- 343 Franco-Belussi L, Provete D. and Oliveira C. (2017). Environmental correlates of internal  
344 coloration in anurans vary throughout space and lineages. Figshare  
345 <https://doi.org/10.6084/m9.figshare.4707187.v1>
- 346 Friedmann, P. S. and Gilcrest, B. A. (1987). Ultraviolet radiation directly induces pigment  
347 production by cultured human melanocytes. *J. Cell. Physiol.* 133, 88-94
- 348 Ginés, R., Afonso, J.M., Argüello, A., Zamorano, M.J., and López, J. L. (2004). The effects of  
349 long-day photoperiod on growth, body composition and skin colour in immature gilthead  
350 sea bream (*Sparus aurata* L.). *Aquac. Res.* 35, 1207-1212
- 351 Grant, T., Frost, D.R., Caldwell, J. P., Gagliardo, R., Haddad, C.F.B., Kok, P. J. R., Means, D.  
352 B., Noonan, B. P., Schargel, W. E. and Wheeler, W. C. (2006). Phylogenetic systematics  
353 of the dart-poison frogs and their relatives (Amphibia: Athesphatanura: Dendrobatidae).  
354 *Bull. Am. Mus. Nat. Hist.* 1-262.
- 355 Han, D., Xie, S., Lei, W., Zhu, X., and Yang, Y. (2005). Effect of light intensity on growth,  
356 survival and skin color of juvenile Chinese longsnout catfish (*Leiocassis longirostris*  
357 Günther). *Aquac.* 248, 299-306
- 358 Hijmans, R. J., Cameron, S.E., Parra, J. L., Jones, P. G. and Jarvis, A. (2005). Very high  
359 resolution interpolated climate surfaces for global land areas. *Int. J. Climatol.* 25, 1965-  
360 1978
- 361 Legendre, P., Legendre, L. (2012). *Numerical Ecology*. 3rd. edition. Elsevier Limited, Oxford.
- 362 Lipinski, V.M., Santos, T. G. and Schuch, A. P. (2016). An UV-sensitive anuran species as an  
363 indicator of environmental quality of the Southern Atlantic Rainforest. *J. Photochem.*  
364 *Photobiol. B: Biol.* 165,174-181.
- 365 Lyon, V.E. and Baker, B.I. (1993). The effect of photoperiod on plasma levels of melanin-  
366 concentrating hormone in the trout. *J. Neuroendocrinol.* 5, 493-499

- 367 Moriya, T., Miyashita, Y., Arai, J. I., Kusunoki, S., Abe, M., and Asami, K. (1996).  
368 Light-sensitive response in melanophores of *Xenopus laevis*: I. Spectral characteristics of  
369 melanophore response in isolated tail fin of *Xenopus* tadpole. *J. Exp. Zool.* 276, 11-18
- 370 Oliveira, C. and Franco-Belussi, L. (2012). Melanic pigmentation in ectothermic vertebrates:  
371 occurrence and function. In: *Melanin: Biosynthesis, Functions and Health Effects*, Nova  
372 Publishers, pp. 213-226.
- 373 Ortonne, J.P. (2002). Photoprotective properties of skin melanin. *Br. J. Dermatol.* 146, 7-10.
- 374 Pavoine, S., Vallet, J., Dufour, A.-B., Gachet, S., and Daniel, H. (2009). On the challenge of  
375 treating various types of variables: application for improving the measurement of  
376 functional diversity. *Oikos* 118, 391-402.
- 377 Pavoine, S., Baguette, M., and Bonsall, M. B. (2010). Decomposition of trait diversity among  
378 the nodes of a phylogenetic tree. *Ecol. Monog.* 80, 485-507.
- 379 Pavoine, S., Vela, E., Gachet, S., Belair, G. and Bonsall, M.B. (2011). Linking patterns in  
380 phylogeny, traits, abiotic variables and space: a novel approach to linking environmental  
381 filtering and plant community assembly. *J. Ecol.* 99, 165–175
- 382 Provete, D.B., Franco-Belussi, L., Santos, L.R.S., Zieri, R., Moresco, R.M., Martins, I. A.,  
383 Almeida, S.C. and Oliveira, C. (2012). Phylogenetic signal and variation of visceral  
384 pigmentation in eight anuran families. *Zool. Scripta*, 41, 547-556
- 385 Pyron, R.A. (2014). Biogeographic analysis reveals ancient continental vicariance and recent  
386 oceanic dispersal in amphibians. *Syst. Biol.* 63, 779–797
- 387 R Core Team. (2016). R: A language and environment for statistical computing. R Foundation  
388 for Statistical Computing, Vienna, Austria. URL <https://www.R-project.org/>
- 389 Riley, P.A. (1997). Melanin. *Int. J. Biochem. Cell Biol.* 29, 1235-1239
- 390 Roulin, A. (2014). Melanin-based colour polymorphism responding to climate change. *Global*  
391 *Change Biol.* 20, 3344-3350
- 392 Santos, L.R.S., Franco-Belussi, L., Zieri, R., Borges, R.E. and Oliveira, C. (2014). Effects of  
393 Thermal Stress on Hepatic Melanomacrophages of *Eupemphix nattereri* (Anura). *Anat.*  
394 *Rec.* 297, 864-875
- 395 Sköld, H.N., Aspengren S. and Wallin M. (2012). Rapid color change in fish and amphibians –  
396 function, regulation, and emerging applications. *Pig. Cell Melan. Res.* 26, 28-39
- 397 Sköld, H.N., Svensson, P.A. and Zejlon, C. (2010). The capacity for internal colour change is  
398 related to body transparency in fishes. *Pig. Cell Melan. Res.* 23, 292-295
- 399 Vasconcelos, T. S. and D. C. Rossa-Feres. (2005). Diversidade, distribuição espacial e temporal  
400 de anfíbios anuros (Amphibia, Anura) na região noroeste do estado de São Paulo, Brasil.  
401 *Biota Neotropica*, 5, 1-14

402 Zuasti, A., Jiménez-Cervantes, C., García-Borrón, J.C., Ferrer, C. (1998). The melanogenic  
403 system of *Xenopus laevis*. Arch. Histol. Cytol. 61,305-316

404 Zuur, A. F., Ieno, E.N. and Elphick, C.S. (2010). A protocol for data exploration to avoid  
405 common statistical problems. Methods Ecol. Evol. 1,3-14

406 Wallin, M. (2002). Nature's Palette: How Animals, Including Humans, Produce Colours. Biosc.  
407 Explain. 1,1-12

408

#### 409 **Figure legends**

410 **Figure 1.** Decomposition of diversity of organ coloration along the nodes of the phylogeny  
411 considering all organs together. For species names see Figure 7. The high values of  
412 diversity are skewed towards the root of the phylogeny, indicating phylogenetic signal.

413 **Figure 2.** Results of the RLQ analysis visualized in space. Circles show the localities. The  
414 coordinates of the sites were analyzed respective to the first ordination axis. Sites in black  
415 are positively correlated to the first axis, while blank sites were negatively correlated. Size  
416 of circles indicate the absolute value of the coordinates.

417 **Figure 3.** Effects of environmental variables and organs on the first axis of RLQ. A) Spearman  
418 rank-correlations between organ coloration category (ordinal) and the coordinates of  
419 species on the first axis. B) Pearson correlation between the environmental variables and  
420 the coordinates of sites in the first axis. Species with high coloration on the heart, kidney,  
421 and rectum occur in sites with high BIO10 and photoperiod, whereas those with high  
422 coloration on the mesenterium, lungs, testicle, and peritoneum occurred in sites with high  
423 BIO2, BIO7, and UVB.

424 **Figure 4.** Results of the RLQ analysis (first axis) visualized on the phylogeny. The coordinates  
425 of the species are the sum of combination of trait and phylogenetic variables.

426 **Figure 5.** Map showing the sites sampled in this study and those to which we obtained data  
427 from the literature or museum.

428 **Figure 6.** Phylogeny of 43 species from six families used in this study with all 388 individuals  
429 included as polytomy.

430

#### 431 **Supplementary material**

432 Figure S1. Decomposition of the diversity of organ coloration along the nodes of the phylogeny.

433 A) Testicle; B) Rectum; C) Heart; D) Lungs; E) Kidneys; F) Peritoneum; G)  
434 Mesenterium.

435 Table S1. Results of the phylogenetic correlation analysis for each organ separately and all  
436 together.

437 Appendix 1. List of all specimens analyzed.

438

439

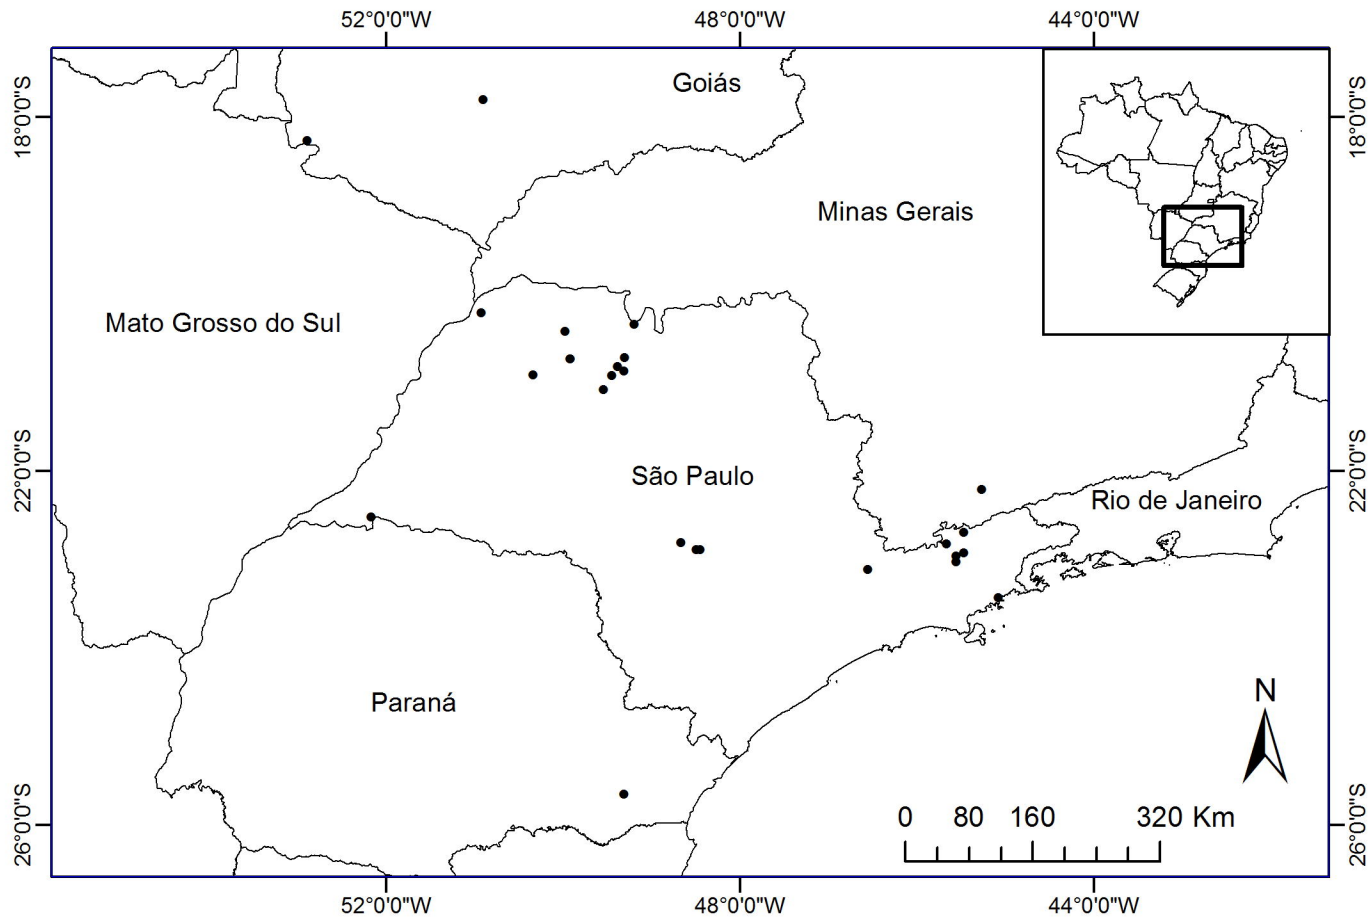



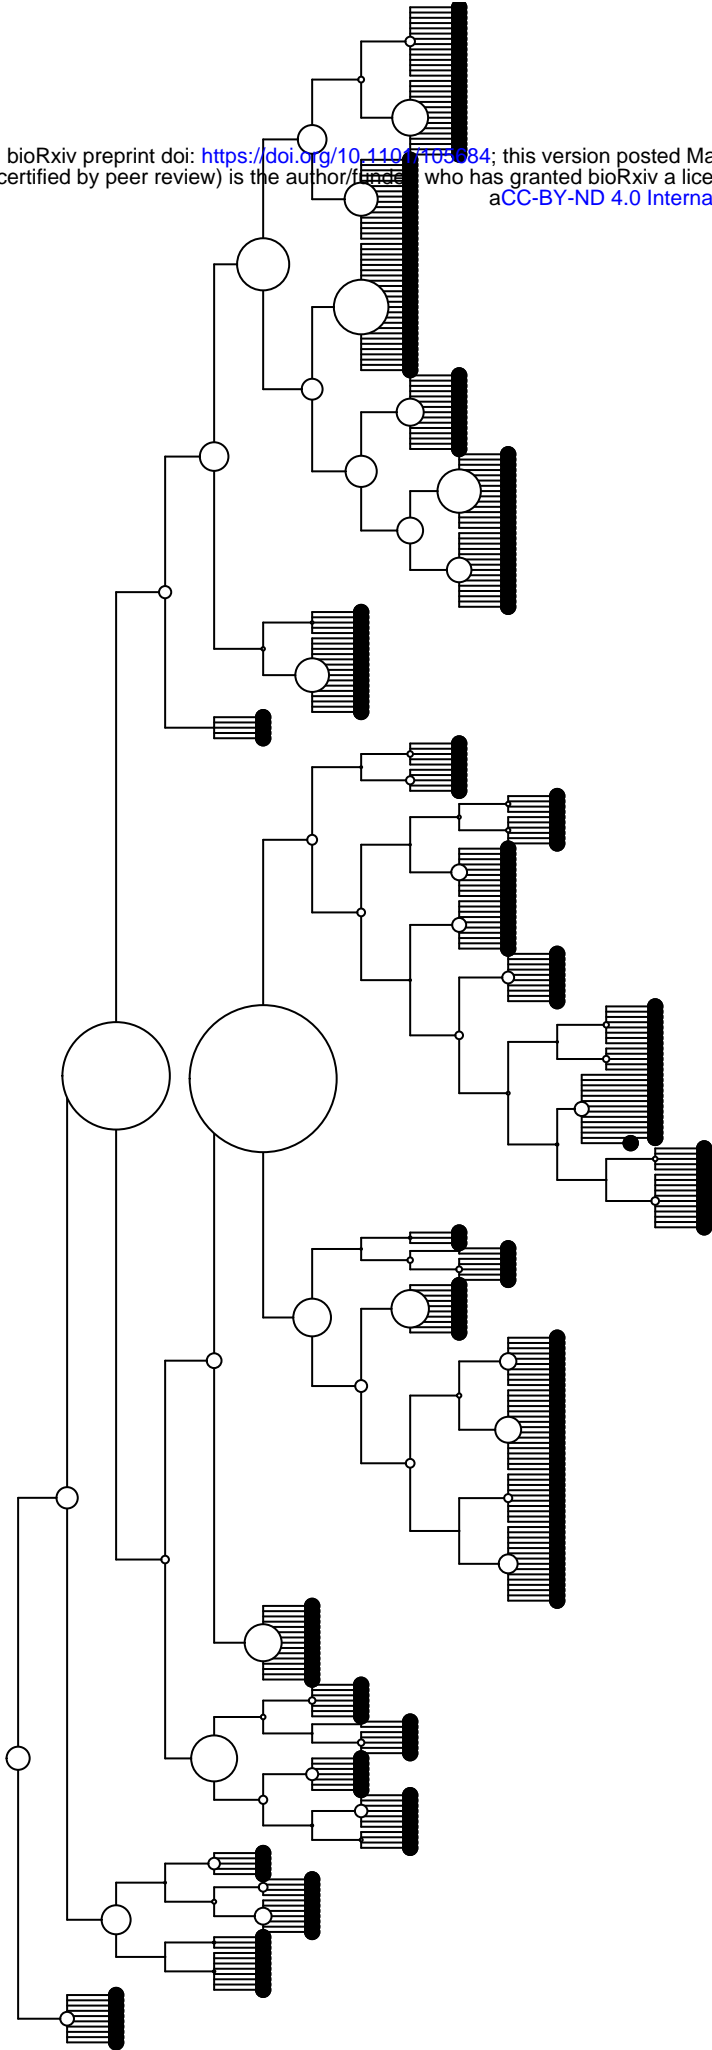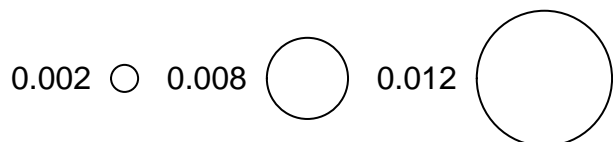

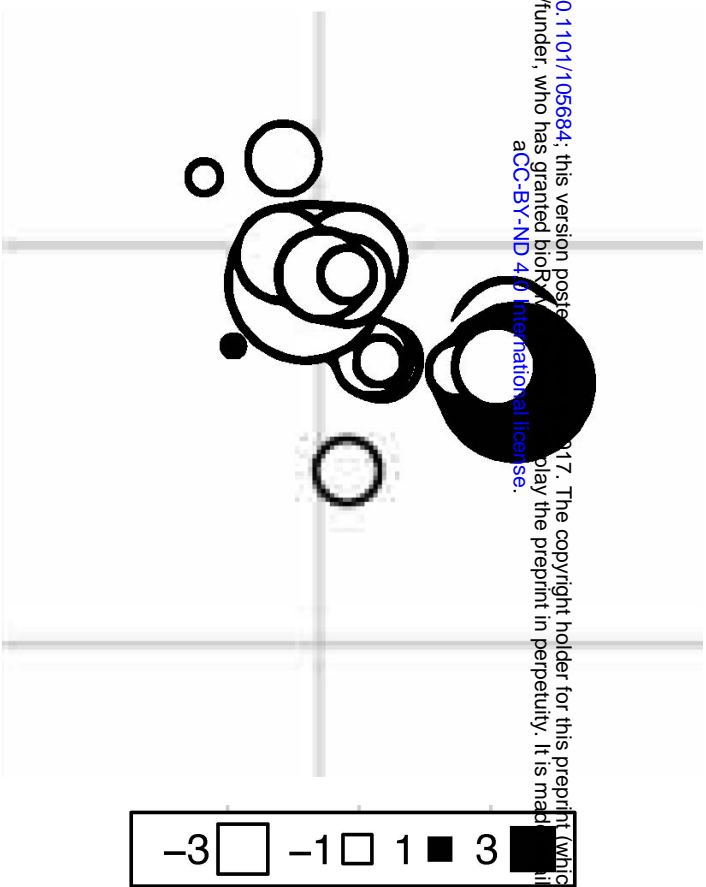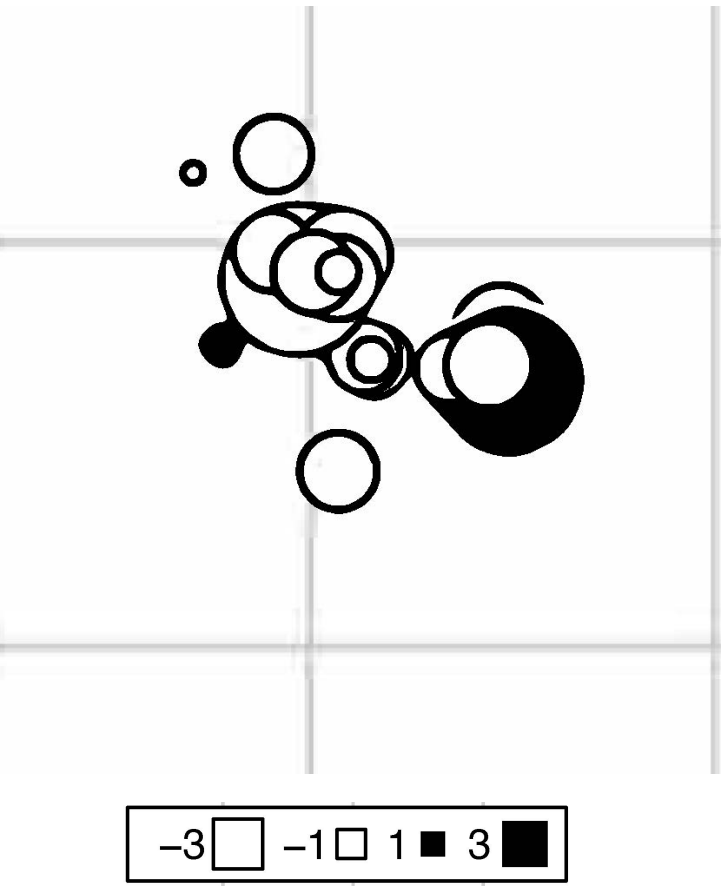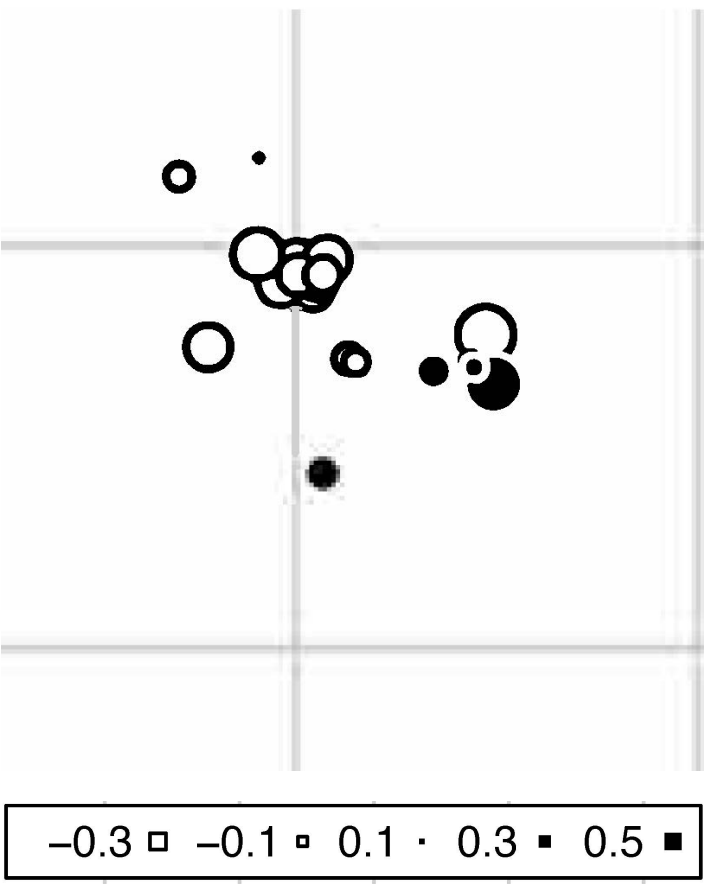

**A**

bioRxiv preprint doi: <https://doi.org/10.1101/105684>; this version posted March 9, 2017. The copyright holder for this preprint (which was not certified by peer review) is the author/funder, who has granted bioRxiv a license to display the preprint in perpetuity. It is made available under aCC-BY-ND 4.0 International license.

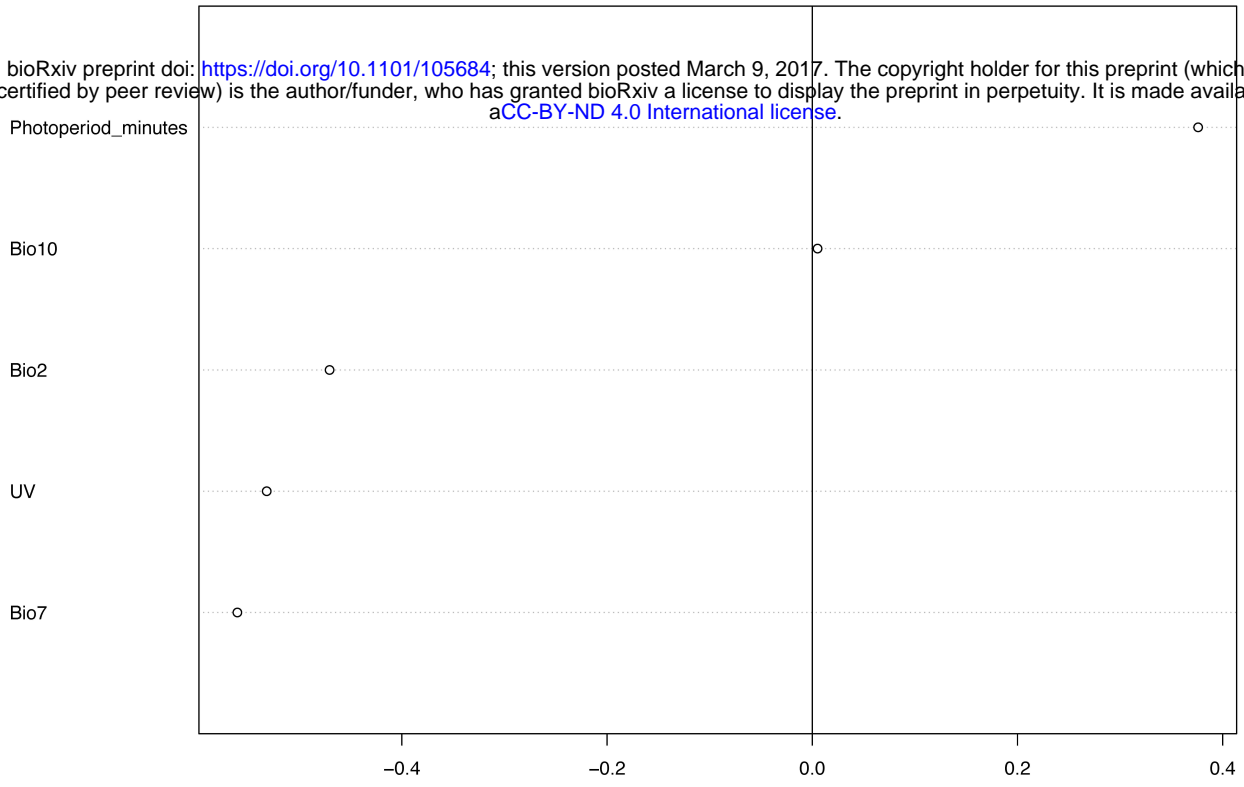**B**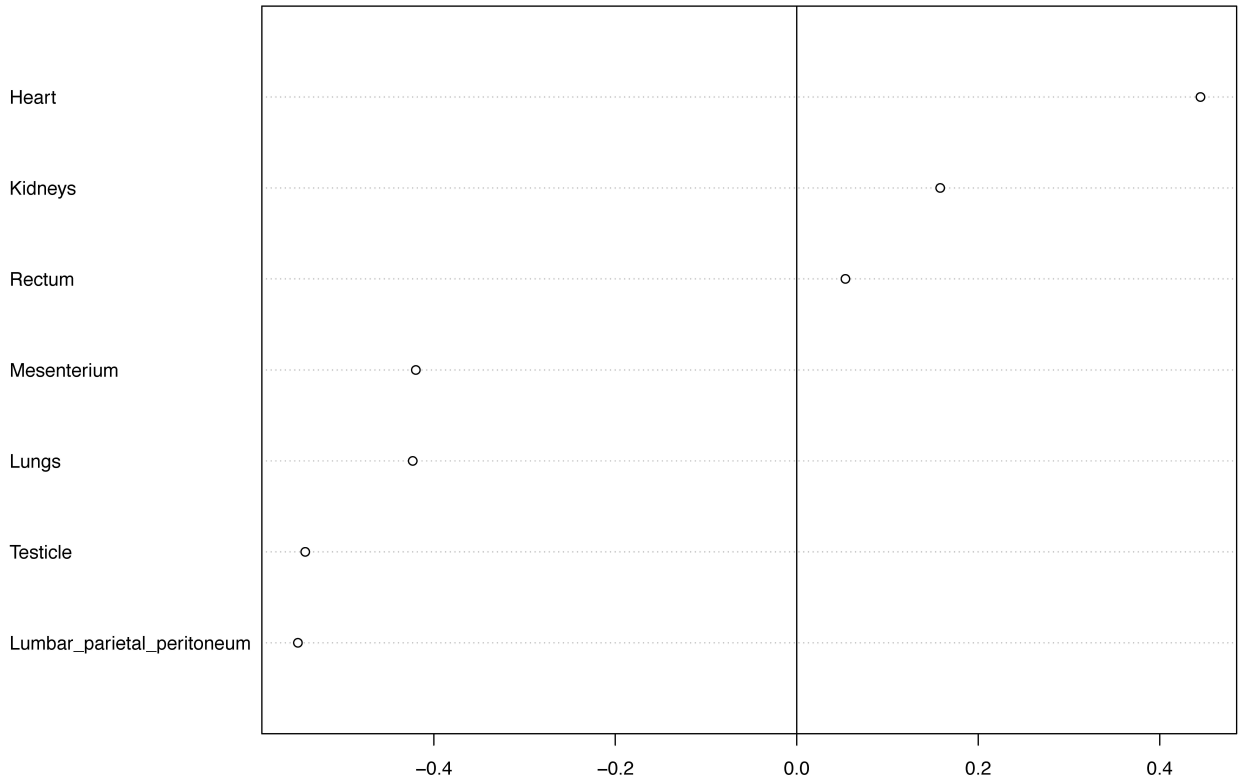

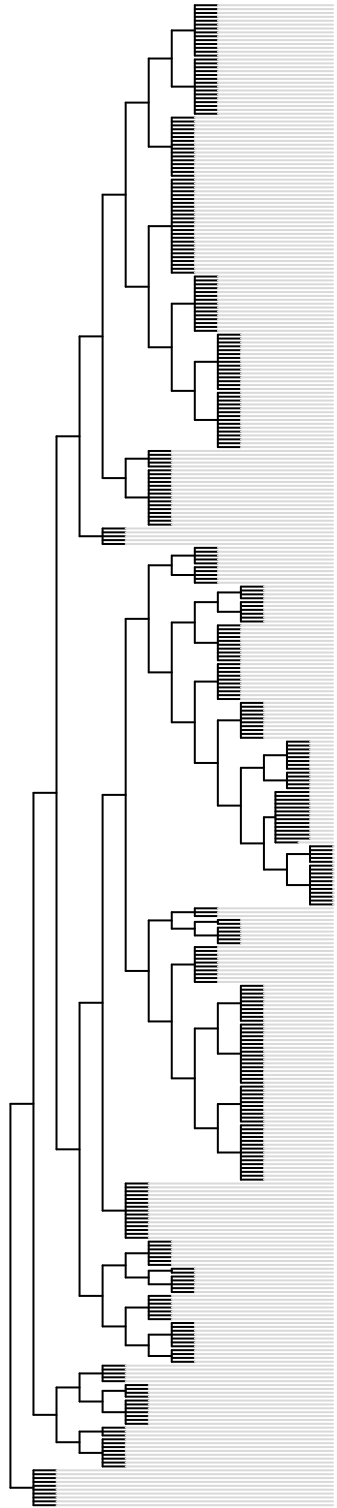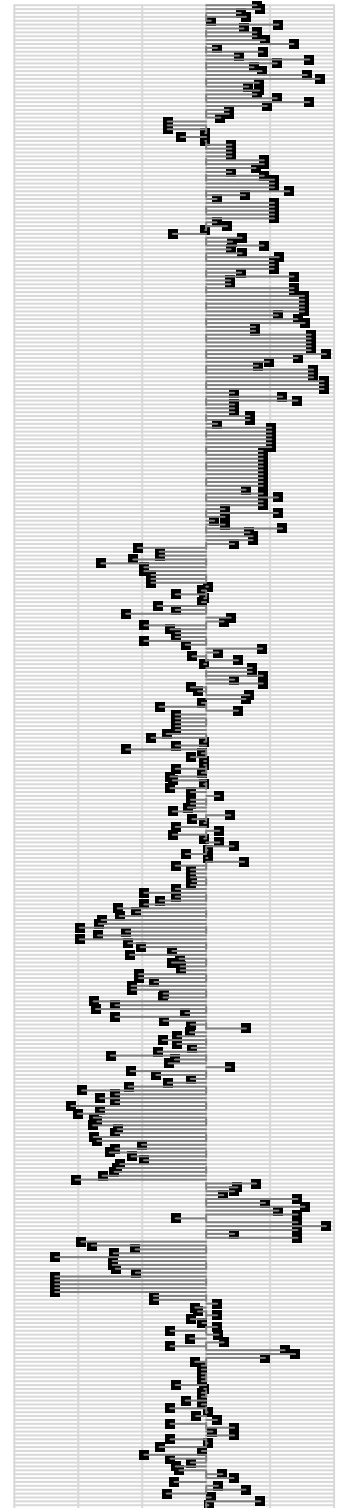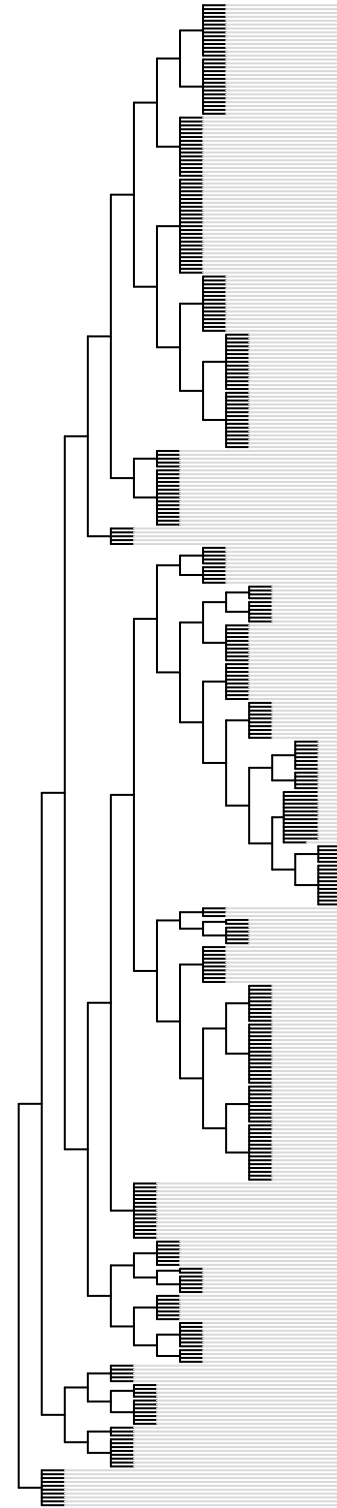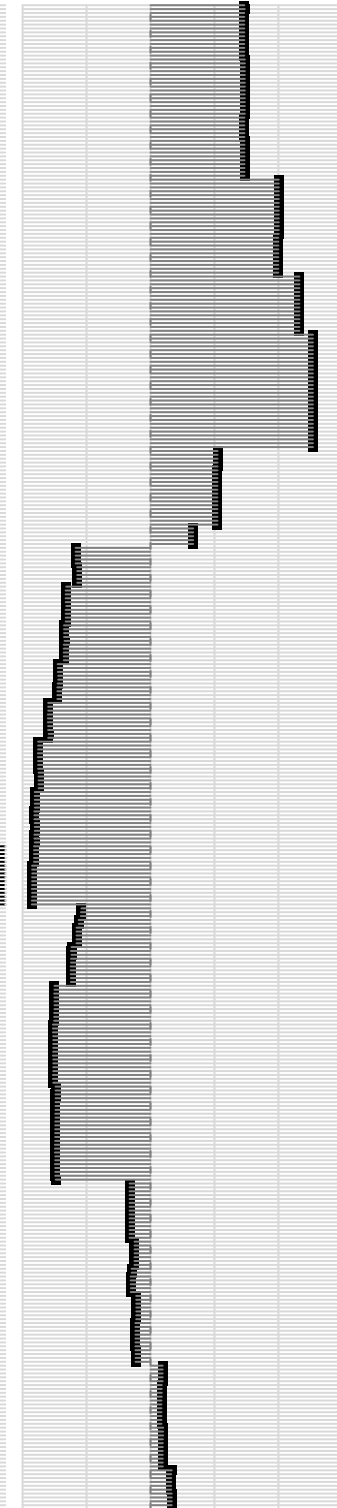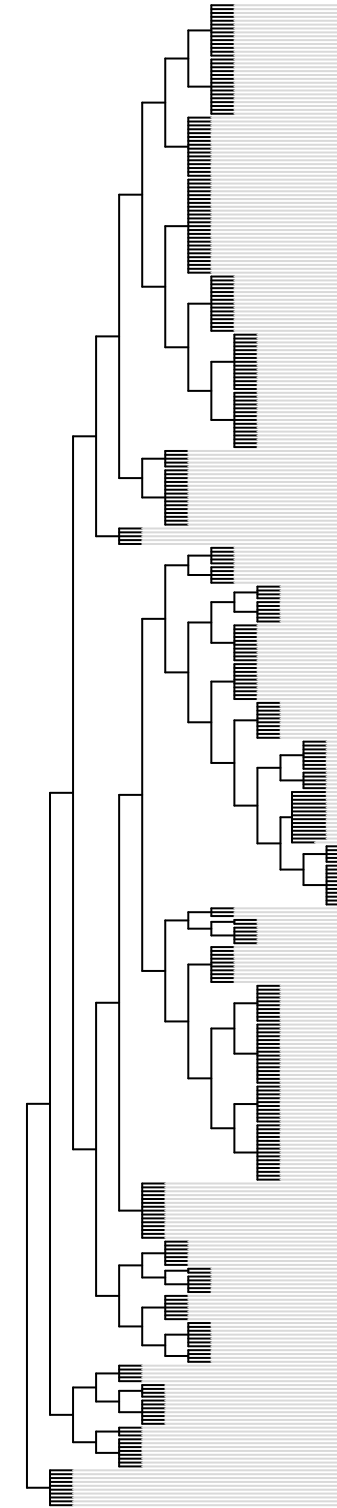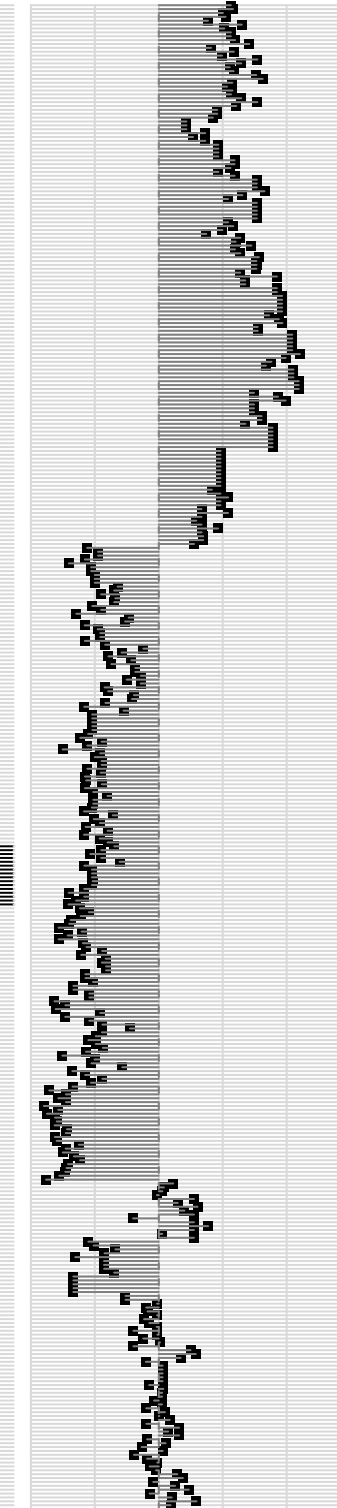

trait-based

phylogeny-based

global

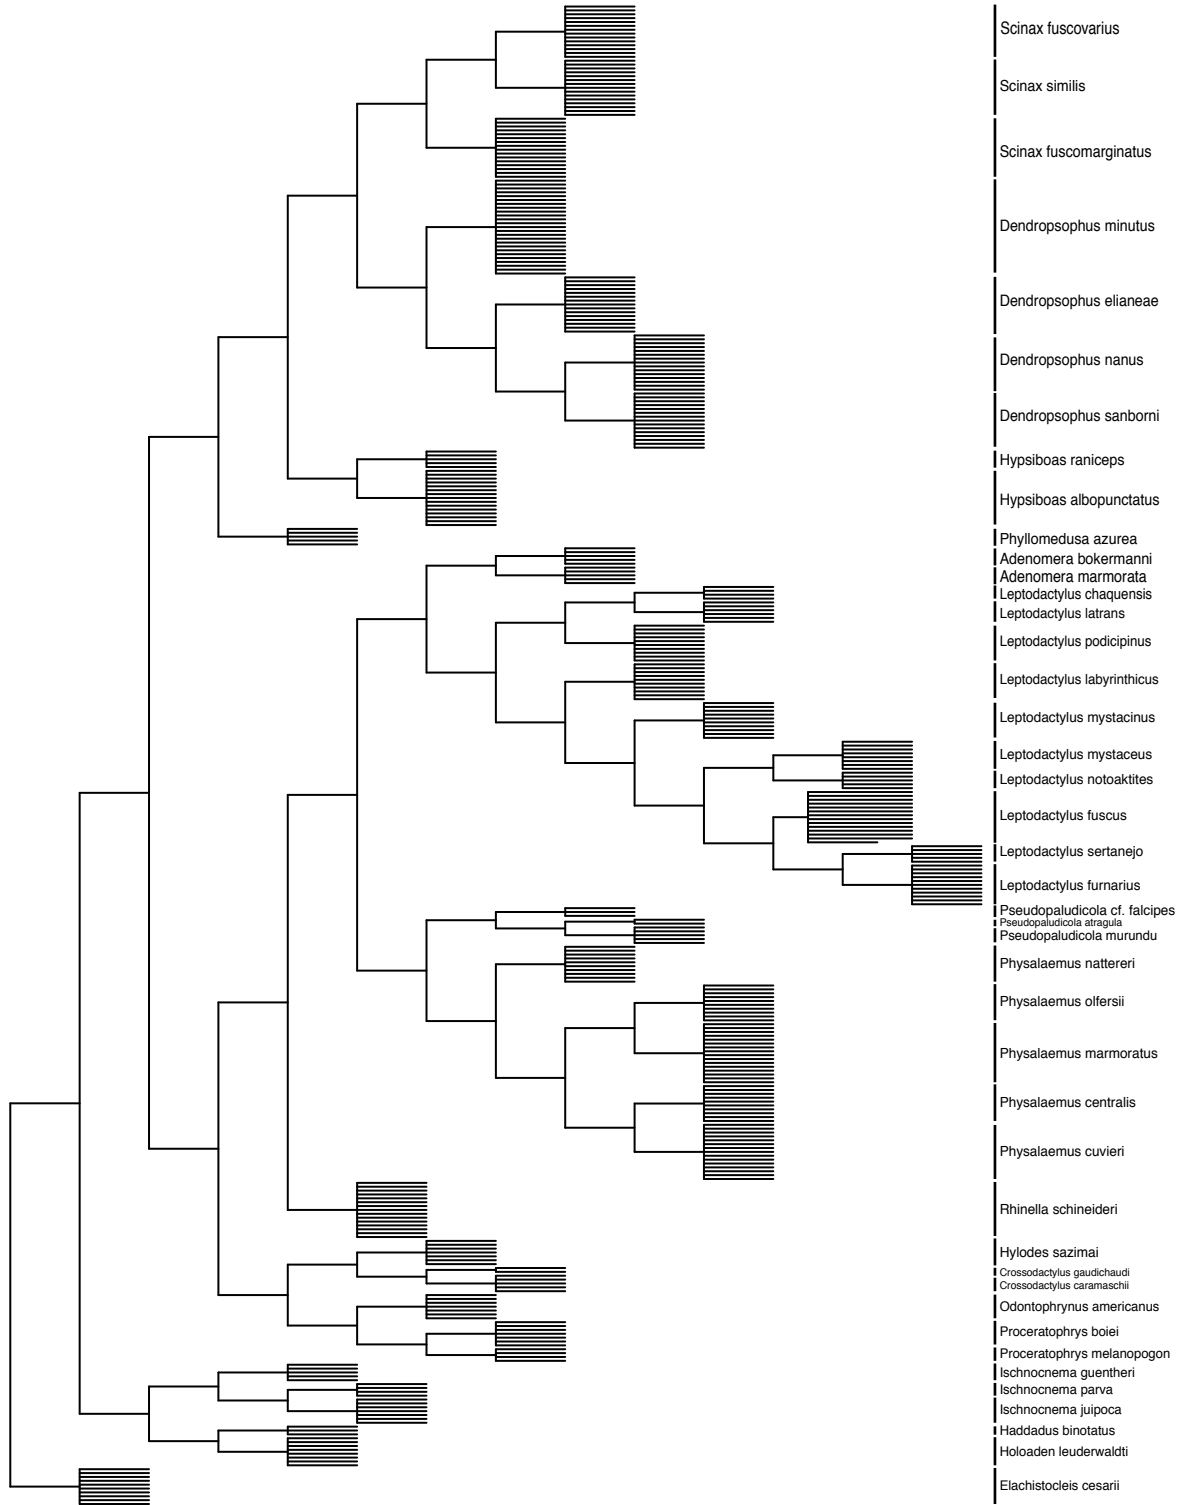

Source: http://biorxiv.org/content/10.1101/105684v1.full.pdf
